# Supplementary material for: Insights on cold plasma ammonia synthesis and decomposition using alkaline earth metal-based perovskites
Source: Royal Society of Chemistry journal article supplement (doi:10.1039/d1cy00729g), 2021-01-01
Supplement: d1cy00729g1.pdf [file d1cy00729g1.pdf]

## Electronic Supporting Information

# Insights on the Cold Plasma Ammonia Synthesis and Decomposition using alkaline earth metal-based Perovskites

*Fnu Gorky,<sup>a</sup> Jolie M. Lucero,<sup>b</sup> James M. Crawford,<sup>b</sup> Beth A. Blake,<sup>a</sup> Shelby R. Guthrie,<sup>a</sup> Moises A. Carreon,<sup>b</sup> and Maria L. Carreon<sup>\*,a</sup>*

<sup>a</sup>Chemical and Biological Engineering Department, South Dakota School of Mines & Technology, 501 E Saint Joseph St, Rapid City, South Dakota– 57701, USA

<sup>b</sup>Chemical and Biological Engineering Department, Colorado School of Mines, Golden, CO 8040, USA

\*Corresponding author: [Maria.CarreonGarciduenas@sdsmt.edu](mailto:Maria.CarreonGarciduenas@sdsmt.edu)

### Table of Contents

|                                                                                                                |     |
|----------------------------------------------------------------------------------------------------------------|-----|
| S1. State of The Art.....                                                                                      | S2  |
| S2. Average crystal size of perovskite catalysts.....                                                          | S3  |
| S3. OES Plasma Only Vs. MgTiO <sub>3</sub> .....                                                               | S4  |
| S4. Repeating Cycles for MgTiO <sub>3</sub> .....                                                              | S5  |
| S5. Spent Perovskite (FTIR Spectra).....                                                                       | S6  |
| S6. OES for MgTiO <sub>3</sub> at different plasma Power (5W, 10W, 20 W).....                                  | S7  |
| S7. Equations employed.....                                                                                    | S8  |
| S8. Only Plasma (N <sub>2</sub> :H <sub>2</sub> ) Vs Helium Dilution (N <sub>2</sub> :H <sub>2</sub> :He)..... | S9  |
| S9. OES for MgTiO <sub>3</sub> with & without Helium Dilution at Constant Watts.....                           | S10 |
| S10. OES for NH <sub>3</sub> Decomposition for MgTiO <sub>3</sub> at different Watts.....                      | S11 |
| S11. Comparison on perovskites performance (State-of-the-Art) .....                                            | S12 |
| S12. Reactor Electrical Characterization.....                                                                  | S13 |
| S13. Details on Mechanism Plot (Figure 8) .....                                                                | S14 |
| S14. Details on Ammonia Calibration Curve.....                                                                 | S15 |
| S15. Live Gas Chromatography report for identification of ammonia peak.....                                    | S16 |
| S16. DBD Reactor Setup.....                                                                                    | S17 |
| S17. Surface area (m <sup>2</sup> g <sup>-1</sup> ) of the perovskite samples.....                             | S18 |
| S18. Perovskites Porosity (ϕ) (Fresh Vs. Spent) .....                                                          | S19 |
| S19. References .....                                                                                          | S20 |

## State of The Art

Table S1 Summary of the literature on ammonia production over Mg based catalysts.

| Year | Catalysis <sup>1</sup> | Catalyst                             | Flow Rate        | Pressure | H <sub>2</sub> /N <sub>2</sub> Ratio | Voltage | NH <sub>3</sub> Yield | NH <sub>3</sub> Synthesis Rate <sup>II</sup> | Energy Yield                            | TOF                   | Reference |
|------|------------------------|--------------------------------------|------------------|----------|--------------------------------------|---------|-----------------------|----------------------------------------------|-----------------------------------------|-----------------------|-----------|
|      |                        |                                      | $\frac{ml}{min}$ | Bar      | -                                    | kV      | %                     | $\frac{\mu mol}{min \cdot gcat}$             | $\frac{g \text{ of } NH_3}{kW \cdot h}$ | s <sup>-1</sup>       |           |
| 1986 | NTP-DBD                | MgO                                  | 160              | 1        | 3                                    | -       | 3.1                   | -                                            | -                                       | -                     | 2         |
| 1992 | Thermal                | Ru/MgO                               | 60               | 0.8      | 3                                    | -       | -                     | 3                                            | -                                       | 1.8*10 <sup>-4</sup>  | 3         |
| 2000 | NTP-DBD                | MgO                                  | 2266.7           | 0.006    | 0.8                                  | 0.5     | 0.3                   | -                                            | -                                       | -                     | 4         |
| 2001 | Thermal                | Ba-Ru/MgO                            | 40               | 1        | 3                                    | -       | -                     | 31.9                                         | -                                       | 26.9*10 <sup>-4</sup> | 5         |
| 2002 | Thermal                | Cs-Ru/MgO                            | 40               | 63       | 3                                    | -       | -                     | 32                                           | -                                       | 27*10 <sup>-4</sup>   | 6         |
| 2016 | NTP-DBD                | Cs-Ru/MgO                            | 4000             | 1        | 3                                    | 6       | 2.4                   | -                                            | 2.3                                     | -                     | 7         |
| 2016 | NTP-DBD                | Ru-Mg/Al <sub>2</sub> O <sub>3</sub> | 2000             | 1        | 0.25                                 | 5.4     | 2.5                   | -                                            | 35.7                                    | -                     | 8         |
| 2019 | NTP-DBD                | MgCl <sub>2</sub>                    | 4000             | 1        | 1                                    | 6.4     | -                     | 50                                           | 20.5                                    | -                     | 9         |
| 2020 | NTP-DBD                | MgO                                  | 400              | 1        | 3                                    | 17      | 0.2                   | -                                            | 20.5                                    | -                     | 10        |
| 2020 | Thermal                | Ba+Co/Mg-La                          | 1167             | 90       | 3                                    | -       | 11                    | -                                            | -                                       | -                     | 11        |
| 2021 | NTP-DBD                | This study (MgTiO <sub>3</sub> )     | 25               | 1        | 1                                    | 16      | 0.5                   | 73.4                                         | 3.7                                     | -                     | -         |
|      |                        |                                      | 25               | 1        | 1                                    | 8       | 0.3                   | 36.1                                         | 7.3                                     | -                     | -         |

Catalysis<sup>1</sup> NTP-DBD (Non-Thermal Plasma Dielectric Barrier Discharge) & Thermal Catalysis

NH<sub>3</sub> Synthesis Rate<sup>II</sup> We are presenting the units with  $\mu mol \min^{-1} gcat^{-1}$  in order to homogenize with the present literature.

### Catalyst Characterization (Average Crystal Size)

| <b>Perovskite</b>        | <b>Fresh(<math>\mu\text{m}</math>)</b> | <b>Spent(<math>\mu\text{m}</math>)</b> |
|--------------------------|----------------------------------------|----------------------------------------|
| <b>MgTiO<sub>3</sub></b> | 2.50 $\pm$ 0.90                        | 2.20 $\pm$ 0.80                        |
| <b>SrTiO<sub>3</sub></b> | 1.40 $\pm$ 0.70                        | 1.50 $\pm$ 0.80                        |
| <b>CaTiO<sub>3</sub></b> | 1.00 $\pm$ 0.70                        | 1.40 $\pm$ 0.70                        |
| <b>BaTiO<sub>3</sub></b> | 0.80 $\pm$ 0.40                        | 0.90 $\pm$ 0.50                        |

Table S2 Average crystal size of all studied perovskite catalysts: fresh and spent.

### OES for Plasma Only Vs. MgTiO<sub>3</sub>

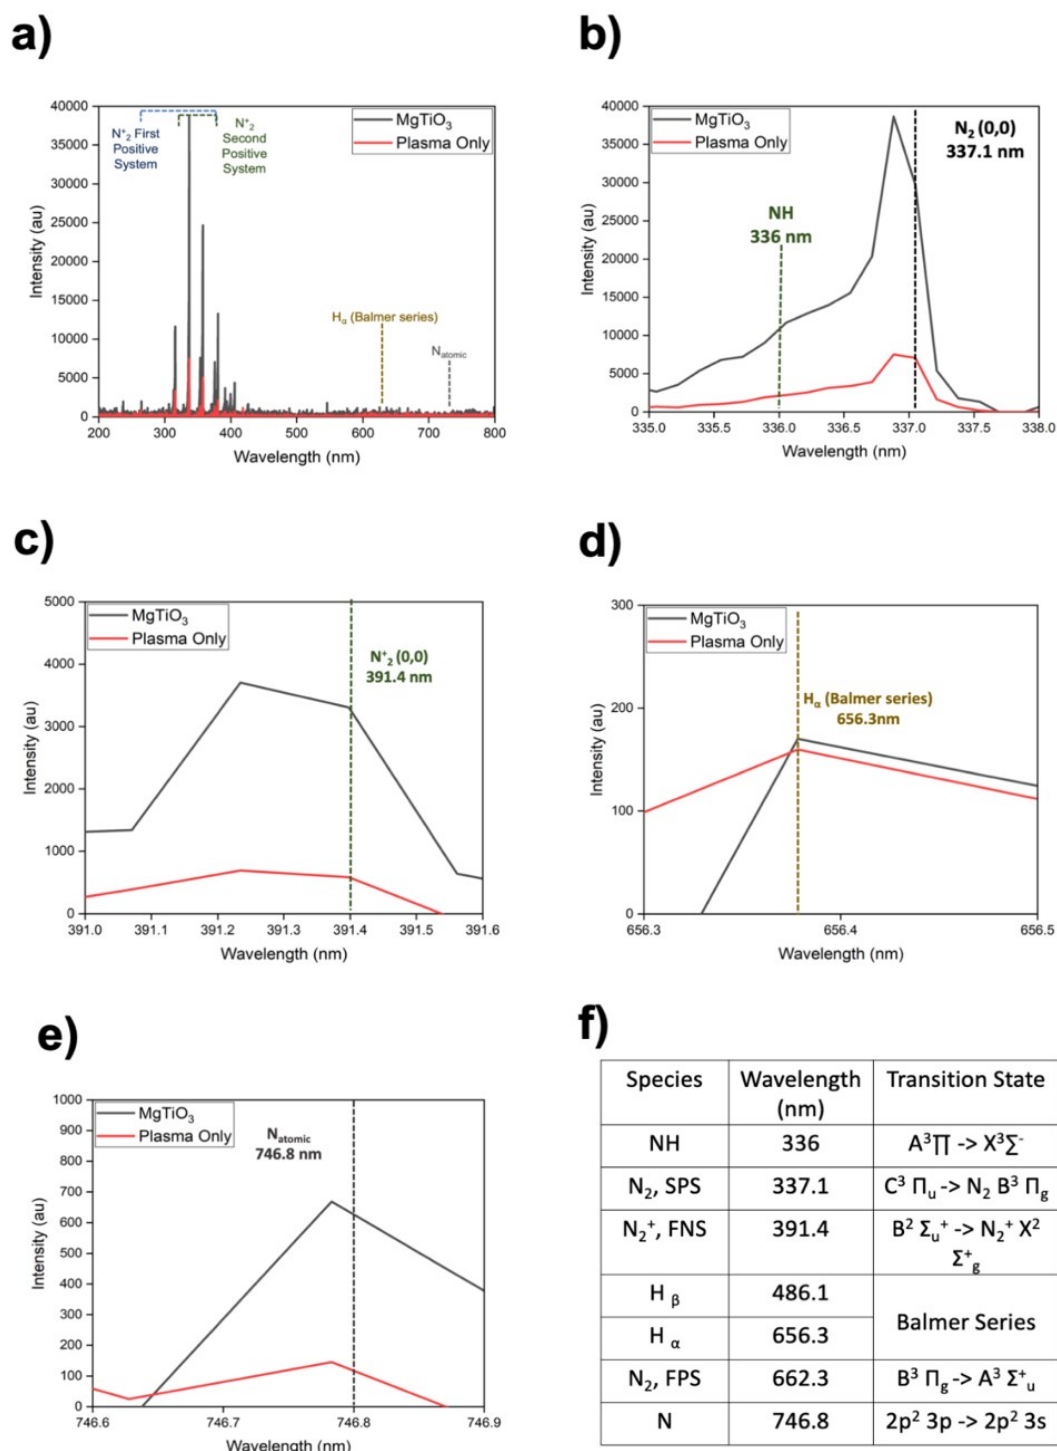

Figure S1 Emission spectra collected during plasma catalytic ammonia synthesis: (a), (b), (c), (d) Emission spectrum of N<sub>2</sub>, NH, N<sub>2</sub><sup>+</sup>, H<sub>α</sub>, and N<sub>atomic</sub> at 1:1 N<sub>2</sub>:H<sub>2</sub> feed ratio MgTiO<sub>3</sub> Vs Plasma Only feed ratio MgTiO<sub>3</sub> at Power (Watts) (20 W) (average bulk temperature of 210 °C) and f) summary of important plasma species.

### Repeating Cycles for MgTiO<sub>3</sub>

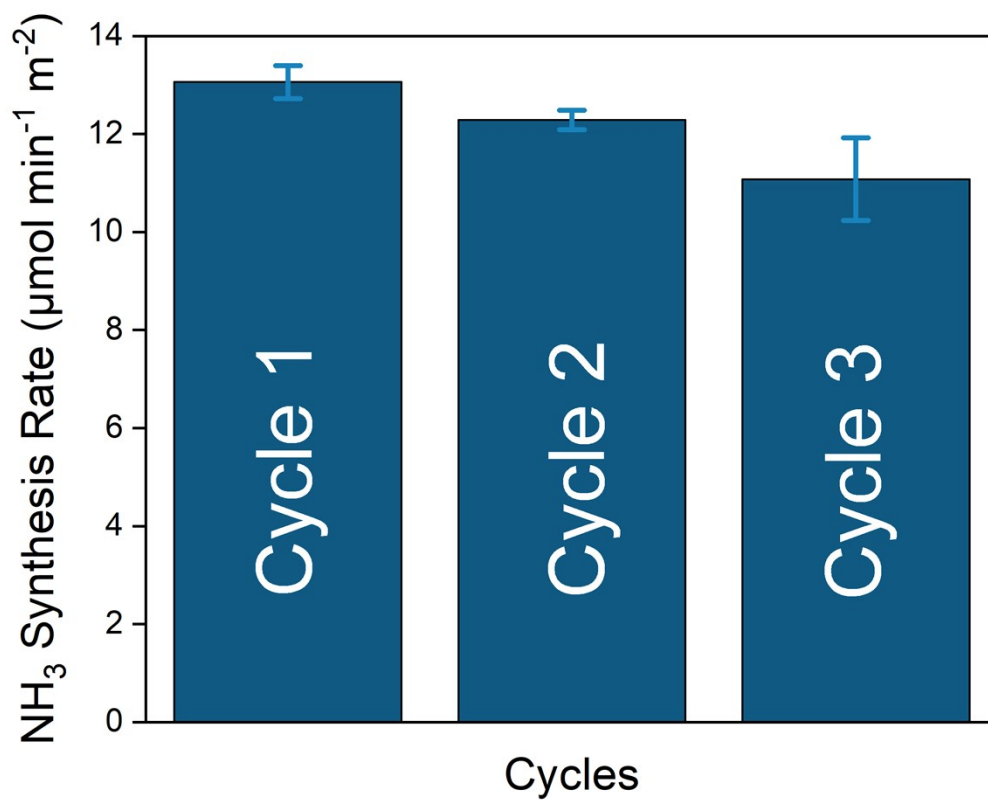

Figure S2 Assessment of catalytic activity after 6 reaction cycles for MgTiO<sub>3</sub> using an equimolar feed (1:1 N<sub>2</sub>:H<sub>2</sub>), every cycle consisting of 15 min.

### Spent Perovskite (FTIR Spectra)

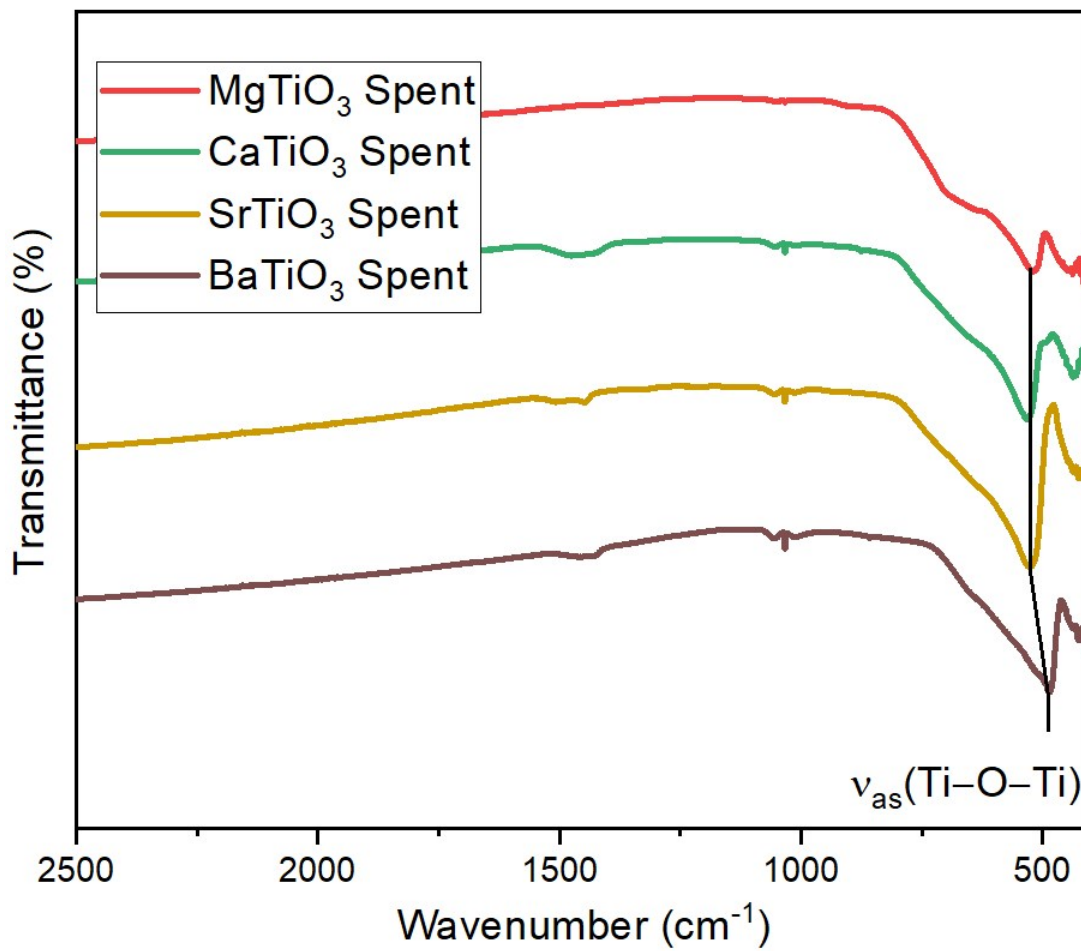

Figure S3. FTIR spectra of the spent perovskite samples.

### OES for MgTiO<sub>3</sub> at different plasma Power (5W, 10W, 20 W)

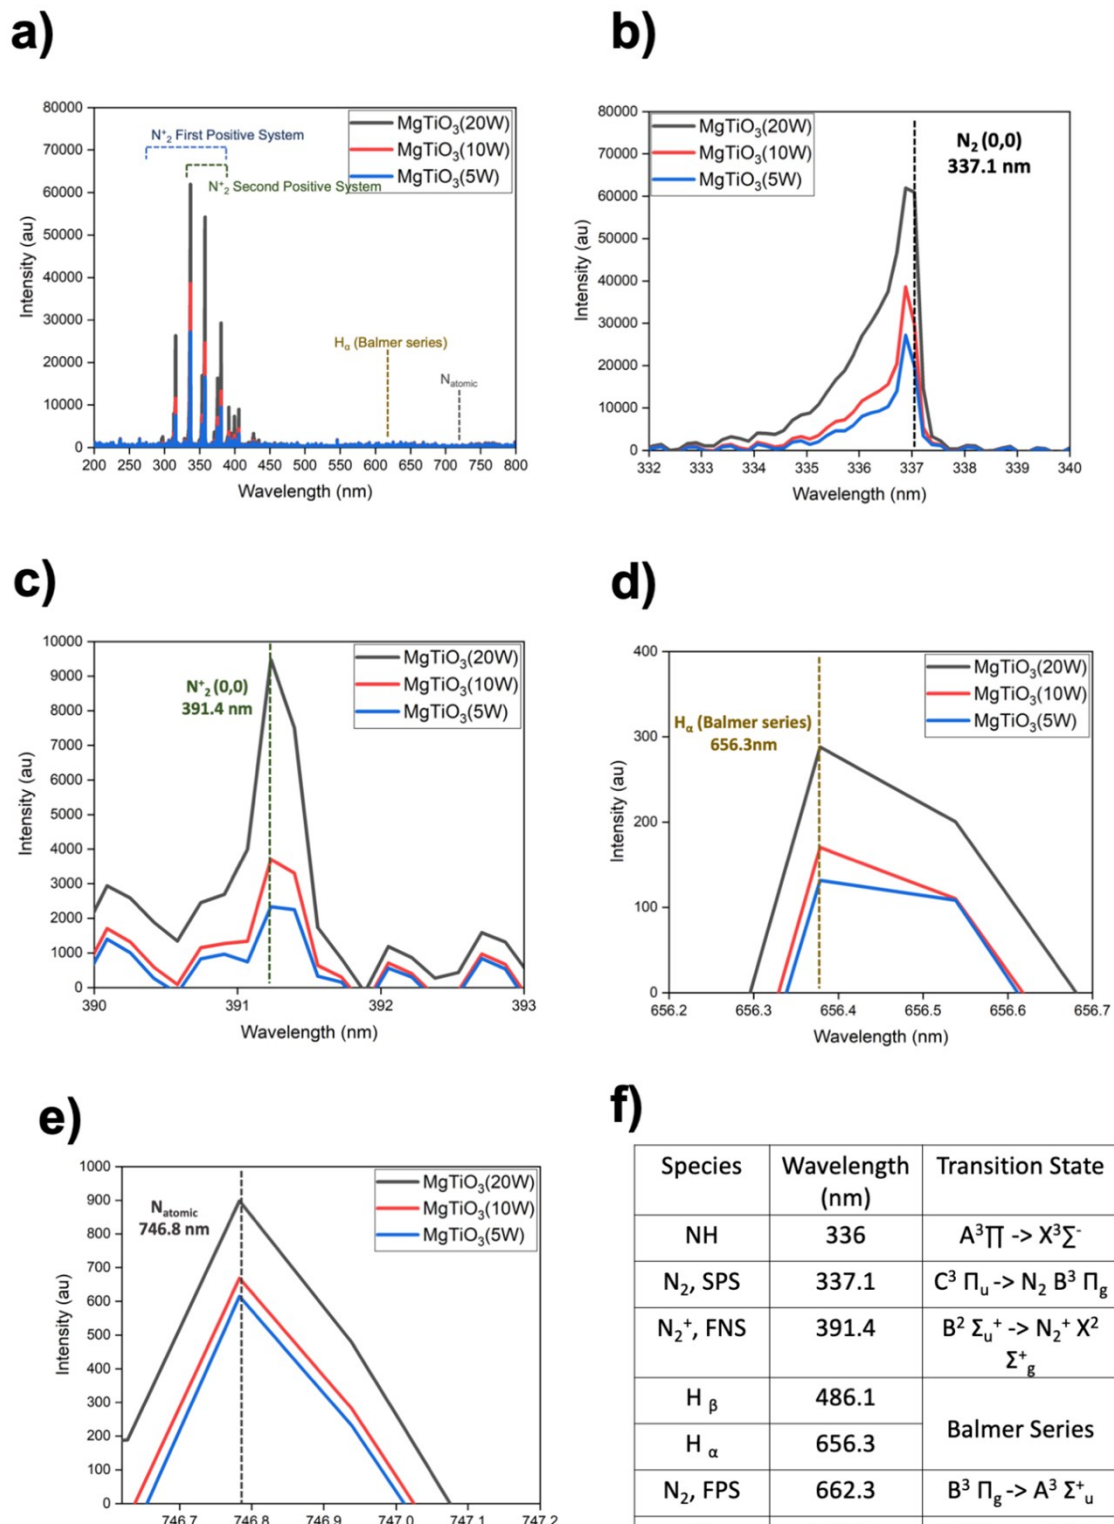

Figure S4 Emission spectra collected during plasma catalytic ammonia synthesis: (a), (b), (c), (d) Emission spectrum of N<sub>2</sub>, N<sub>2</sub><sup>+</sup>, H<sub>α</sub>, and N<sub>atomic</sub> at 1:1 N<sub>2</sub>:H<sub>2</sub> feed ratio MgTiO<sub>3</sub> at different Power (Watts) (5 W, 10 W, 20 W) (average bulk temperature of 155 °C) and f) summary of important plasma species.



### Equations employed:

#### Equation S1:

$NH_3$  Synthesis rate =

$$\frac{GC \text{ area} * 0.745 \text{ (micromoles/sccm} * s)}{\text{Calibration factor}}$$

From Equation:

- NIST factor =  $7.45E-7$  mol/sccm \* s-converting seconds to minutes = 60
- 1 mol = 1000000 micromoles
- $(7.45E-7 \text{ mol/sccm} * s)(1000000 \text{ micromoles/1mol}) = 0.745 \text{ micromoles/sccm} * s$

micromoles

Units: seconds

*Note\* In order to calculate ( $\mu\text{mol min}^{-1} \text{ g-catalyst}^{-1}$ ), divide ( $\mu\text{mol min}^{-1}$ ) by grams of catalyst employed, In Presented study 0.1 grams of catalyst was loaded for each reaction in the plasma reactor.*

*For further calculating synthesis rate per surface area ( $\mu\text{mol min}^{-1} \text{ m}^{-2}$ ), divide the ( $\mu\text{mol min}^{-1} \text{ g-catalyst}^{-1}$ ) by the BET surface area ( $\text{m}^2/\text{g}$ ) for specific material employed.*

#### Equation S2:

$$\text{Energy yield (g-NH}_3\text{/kWh)} = \frac{\text{Ammonia synthesis in (g/hr)}}{\text{Plasma Power (kW)}}$$

g/hr  
Units: kW

### Only Plasma ( $N_2:H_2$ ) Vs Helium Dilution ( $N_2:H_2:He$ )

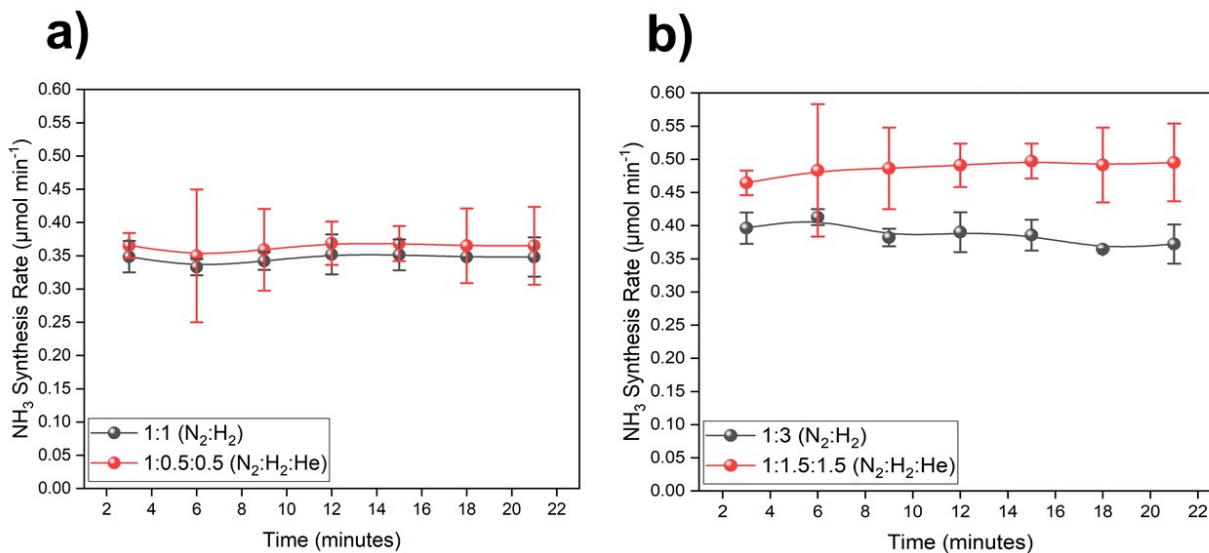

Figure S5 a) Ammonia a synthesis rate for Plasma only Vs. Helium addition at two different feed ratio 1:1 ( $N_2:H_2$ ) Vs. 1:0.5:0.5 ( $N_2:H_2:He$ ) & 1:3 ( $N_2:H_2$ ) Vs. 1:1.5:1.5 ( $N_2:H_2:He$ ) flow ratio and total flow rate of 25 scem at 5W.

### OES for MgTiO<sub>3</sub> with & without Helium Dilution at Constant Watts.

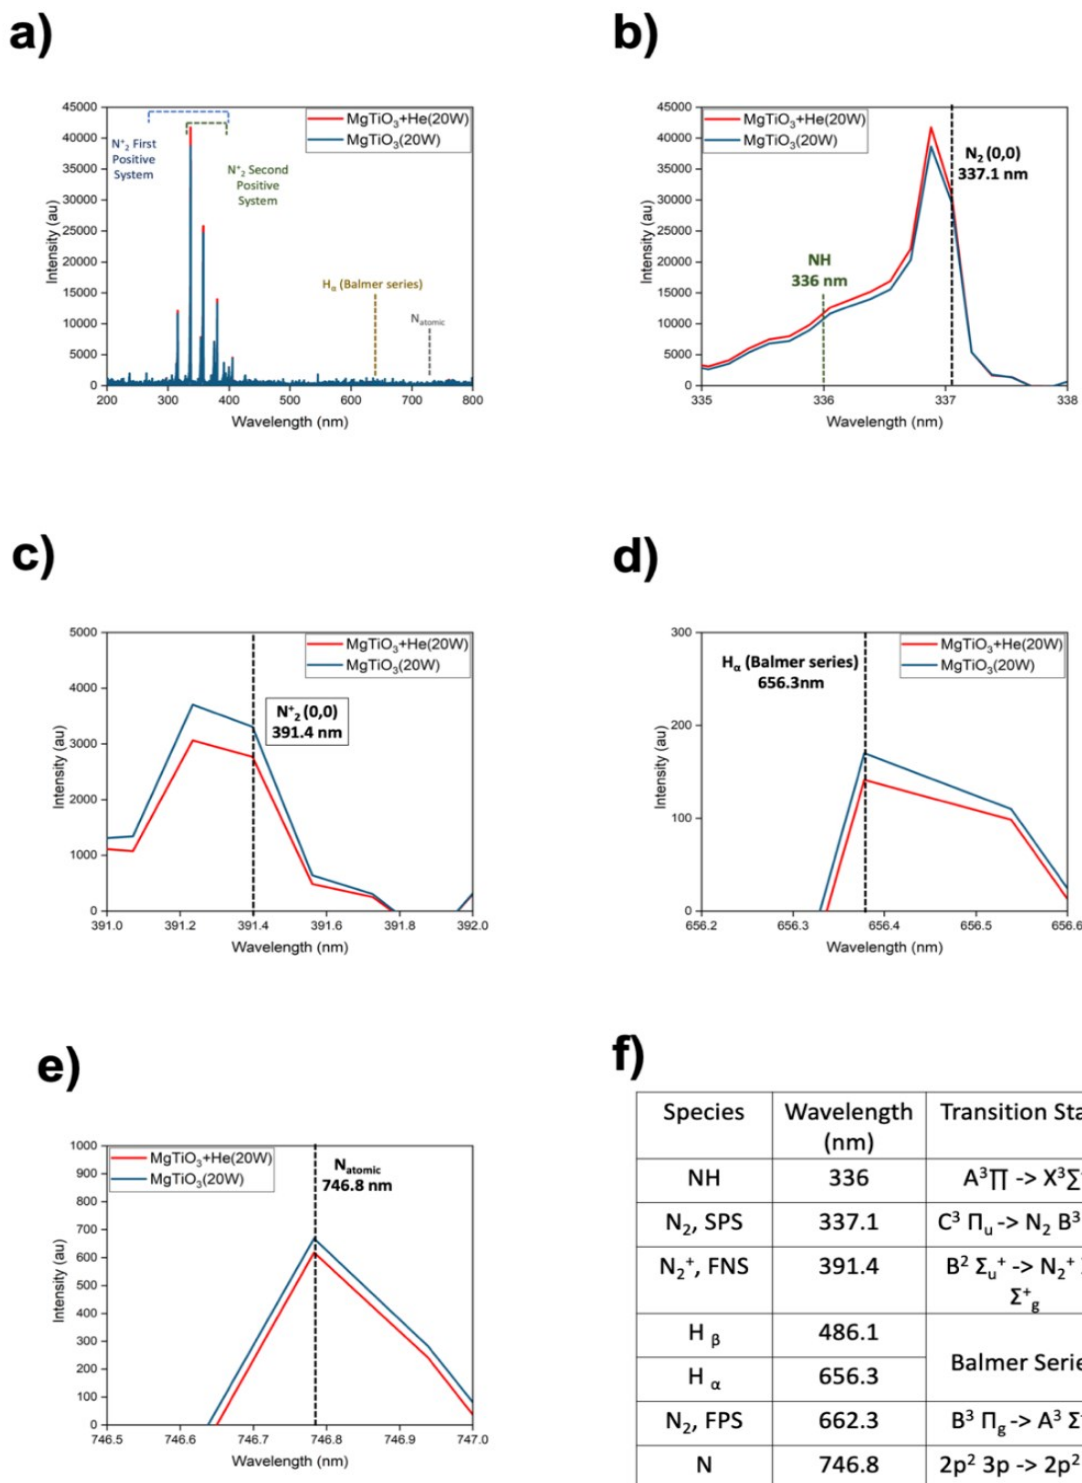

Figure S6 Emission spectra collected during plasma catalytic ammonia synthesis: (a), (b), (c), (d) Emission spectrum of N<sub>2</sub>, NH, N<sub>2</sub><sup>+</sup>, H<sub>α</sub>, and N<sub>atomic</sub> at 1:1 N<sub>2</sub>:H<sub>2</sub> feed ratio MgTiO<sub>3</sub> Vs 1:0.5:0.5 N<sub>2</sub>:H<sub>2</sub>:He feed ratio MgTiO<sub>3</sub> at different Power (Watts) (20 W) (average bulk temperature of 210 °C) and f) summary of important plasma species.

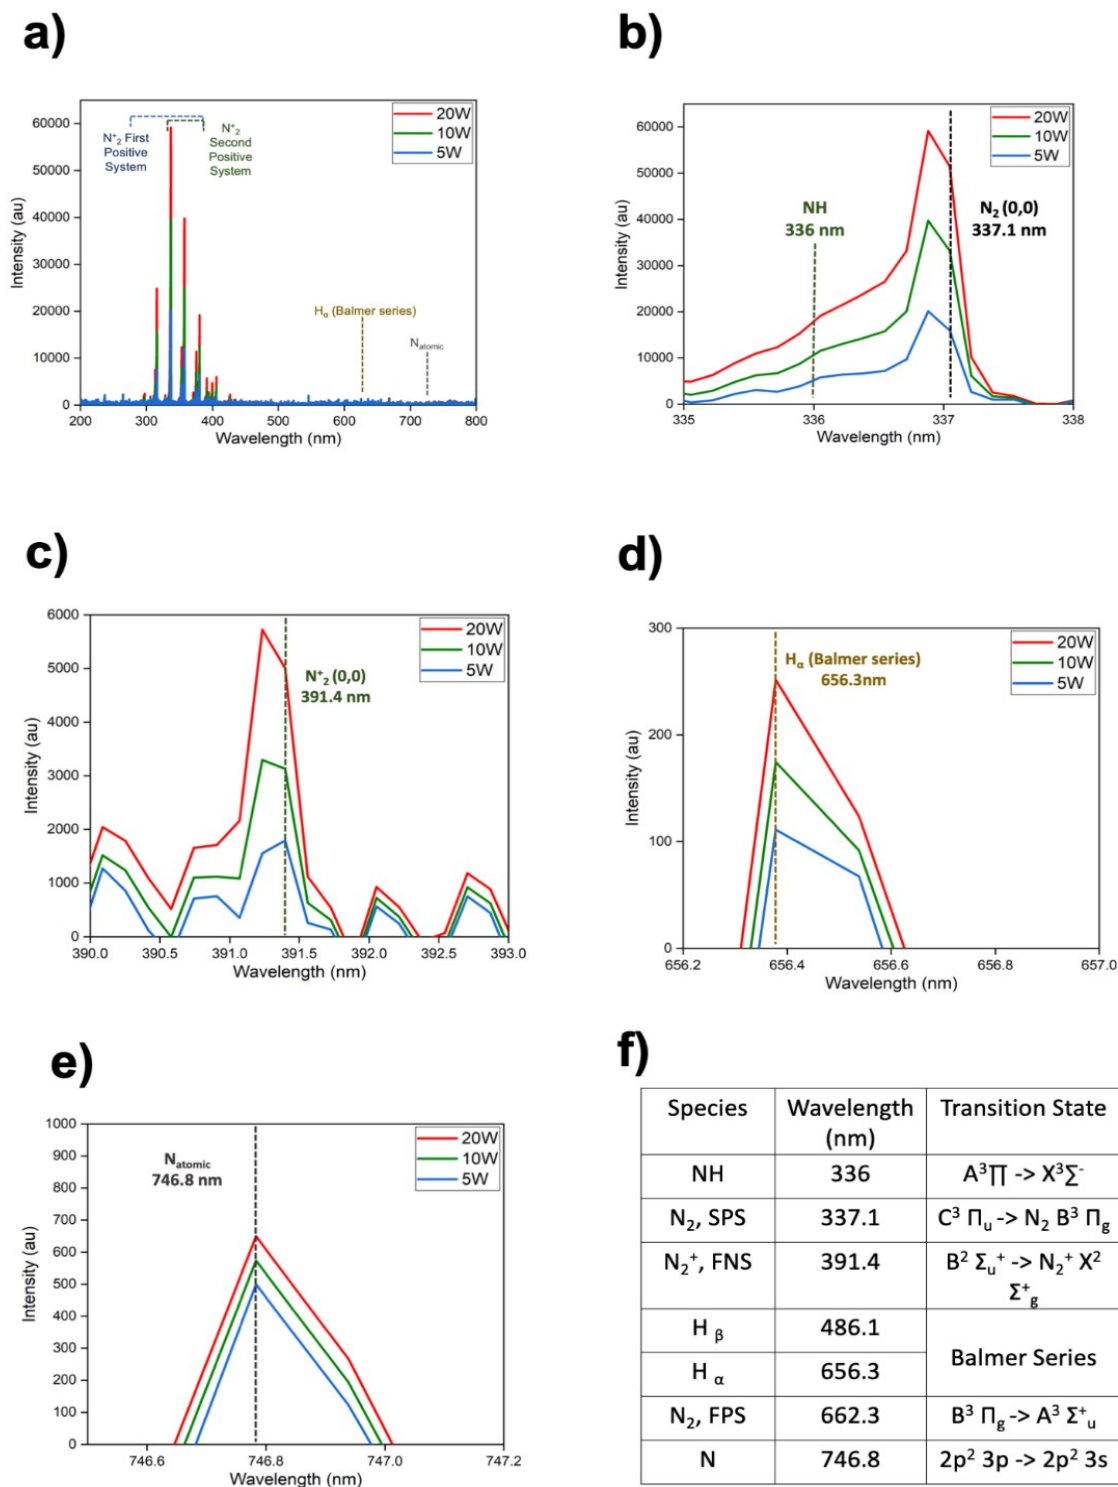

Figure S7 Emission spectra collected during plasma catalytic ammonia synthesis: (a), (b), (c), (d) Emission spectrum of N<sub>2</sub>, N<sub>2</sub><sup>+</sup>, H<sub>α</sub>, and N<sub>atomic</sub> at 1:1 N<sub>2</sub>:NH<sub>3</sub> feed ratio MgTiO<sub>3</sub> at different Power (Watts) (5 W, 10 W, 20 W) (average bulk temperature of 163 °C) and f) summary of important plasma species.

**OES for NH<sub>3</sub> Decomposition for MgTiO<sub>3</sub> at different Watts.**

### Comparison on perovskites performance (State-of-the-Art)

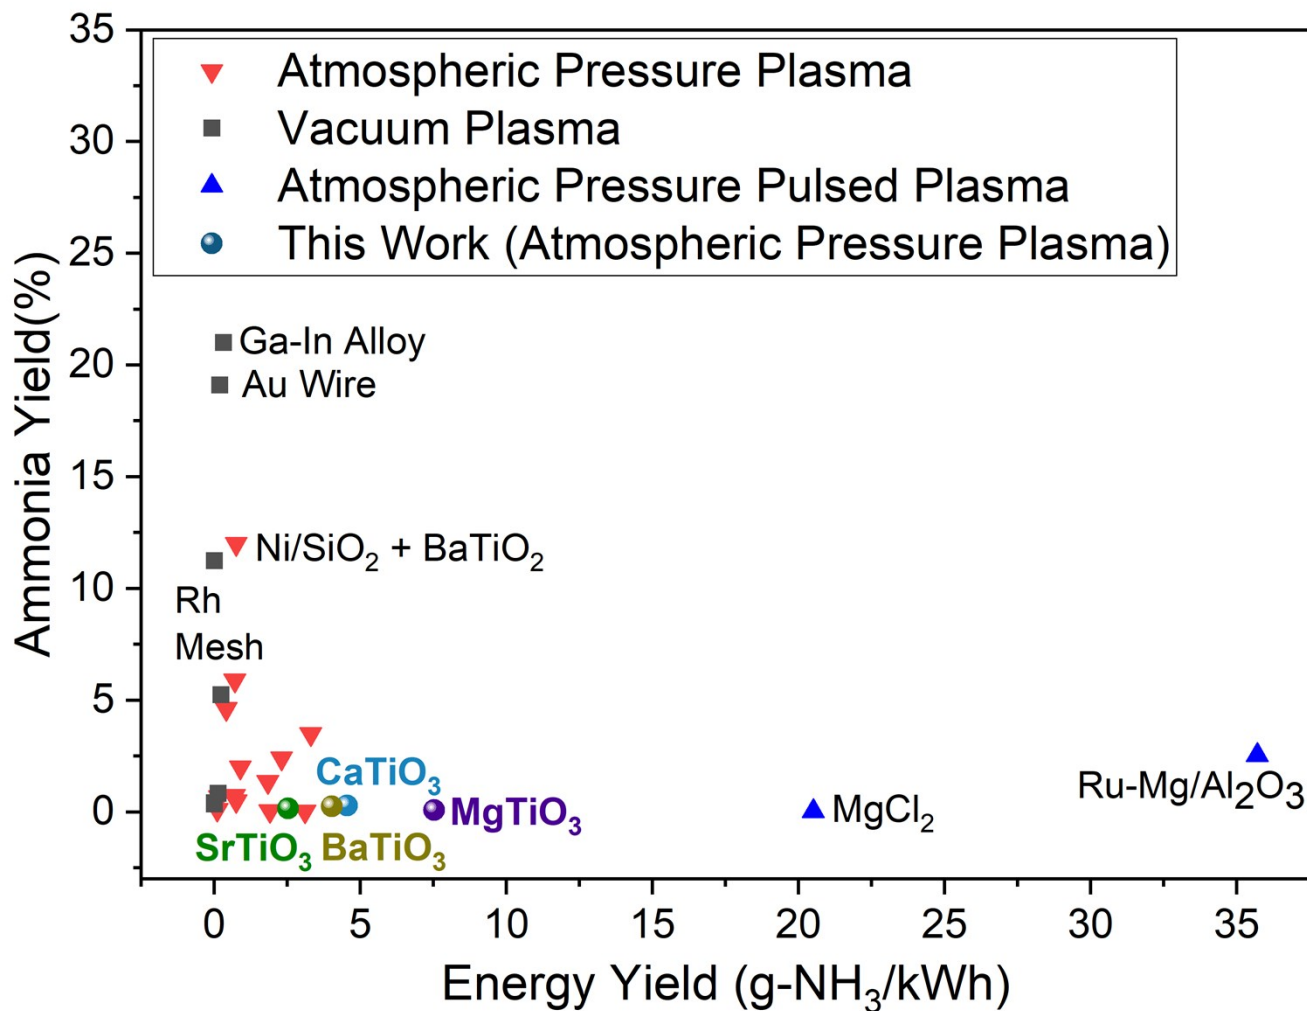

Figure S8 Comparison of perovskites performances of ammonia yield (%) versus energy yield (g-NH<sub>3</sub>/ kWh) with highest values obtained by several research groups. Reproduced from <sup>1</sup>

## Reactor Electrical Characterization

The electrical characterization was carried out by measuring the applied voltage to the reactor by employing a high voltage probe (Tektronix P6015A) and an oscilloscope (Tektronix TDS2014C). The reactor was operated at a frequency of approximately  $\sim 25$  kHz. The complete electrical circuit can be found in our previous publication<sup>12</sup>. The average power was calculated by finding the area under the curve for the V-Q Lissajous plot and multiplying it by the frequency. **Figure S1** shows the voltage-charge characteristics of the DBD reactor with  $\text{MgTiO}_3$  as packing material. These measurements were performed under 1:1  $\text{N}_2:\text{H}_2$  feed ratio and 25 sccm total flow rate. The average measured powers for each material were collected 5 times.

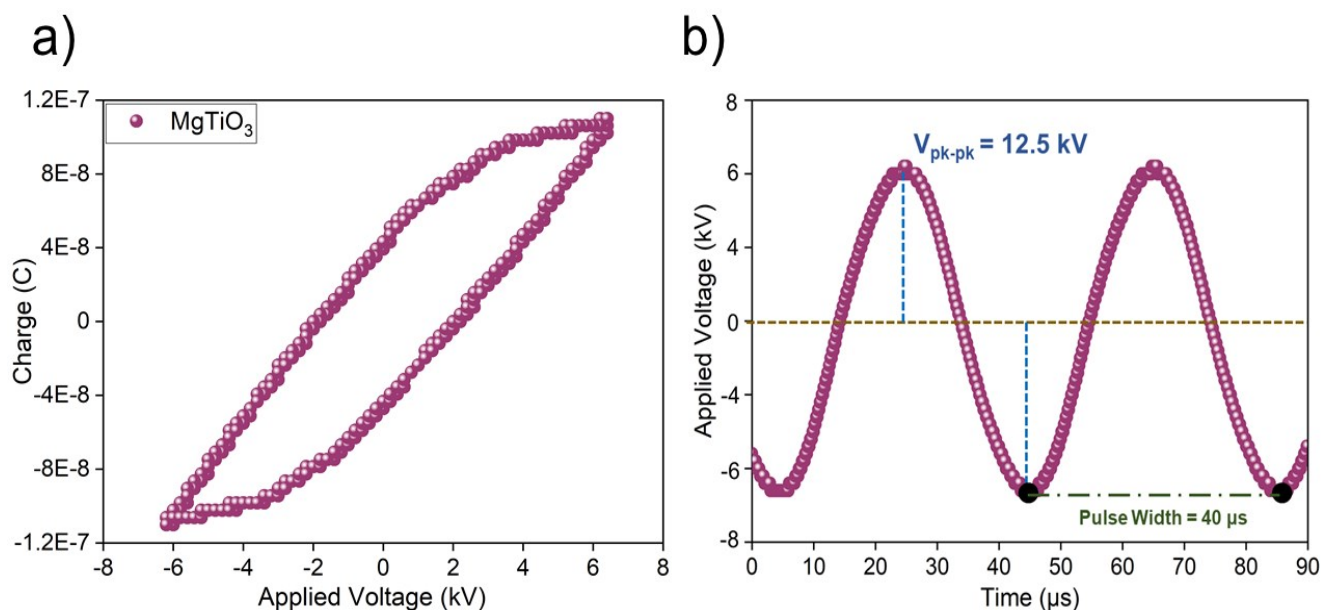

Figure S9 a) Applied voltage (kV) and charge (nC, across a capacitor) waveform collected using the oscilloscope for the  $\text{N}_2:\text{H}_2$  ratio of 1:1. Lissajous curves generated using V-Q waveform for the studied  $\text{MgTiO}_3$ . b) Capacitor Voltage (V) Vs. Time ( $\mu\text{s}$ ) at 10 watts for  $\text{MgTiO}_3$ .

### Detailed data for Figure 8

**Table S3** Summary of (Figure 8.) Dielectric Constant ( $\epsilon_r$ ) Vs. Energy Yield ( $g-NH_3/kWh$ )

| <b>Catalyst</b>              | <b>Energy Yield</b> | <b>Standard Deviation</b> | <b>Dielectric Constant Value</b> | <b>Dielectric Constant References</b> |
|------------------------------|---------------------|---------------------------|----------------------------------|---------------------------------------|
| -                            | $g-NH_3/kWh$        | $\pm$                     | $\epsilon_r$                     | -                                     |
| <b>ZIF-67</b>                | <i>1.19</i>         | <i>0.09</i>               | 2.3                              | 13                                    |
| <b>ZIF-8</b>                 | <i>1.01</i>         | <i>0.07</i>               | 2.2                              | 13                                    |
| <b>SAPO-34</b>               | <i>1.29</i>         | <i>0.04</i>               | 2.6                              | 14                                    |
| <b>Fumed-SiO<sub>2</sub></b> | <i>1.39</i>         | <i>0.06</i>               | 3.1                              | 15                                    |
| <b>MgO</b>                   | <i>2.12</i>         | <i>0.15</i>               | 9.7                              | 15                                    |
| <b>MgTiO<sub>3</sub></b>     | <i>2.78</i>         | <i>0.10</i>               | 15                               | 16, 17                                |
| <b>CaTiO<sub>3</sub></b>     | <i>2.08</i>         | <i>0.05</i>               | 168                              | 18                                    |
| <b>SrTiO<sub>3</sub></b>     | <i>1.83</i>         | <i>0.10</i>               | 305                              | 18                                    |
| <b>BaTiO<sub>3</sub></b>     | <i>2.02</i>         | <i>0.16</i>               | 500                              | 19                                    |

### Ammonia Calibration Curve

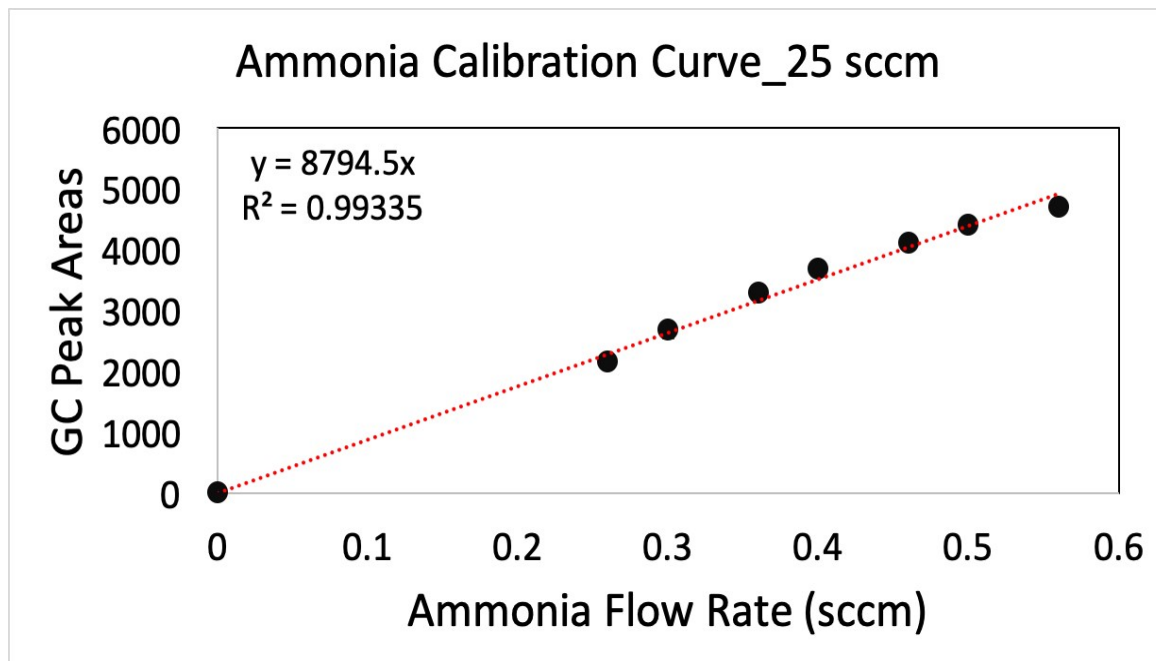

Figure S10 Ammonia Calibration curve.

Table S4 Ammonia Calibration curve details.

| Ammonia sccm (X) | Area (Y) | Standard Deviation (Y error) | Standard Deviation (%) |
|------------------|----------|------------------------------|------------------------|
| 0.00             | 0.00     | 0.00                         | 0.00                   |
| 0.26             | 2160.42  | 46.09                        | 2.13                   |
| 0.30             | 2680.41  | 132.30                       | 4.94                   |
| 0.36             | 3287.96  | 29.85                        | 0.91                   |
| 0.40             | 3676.92  | 26.77                        | 0.73                   |
| 0.46             | 4113.33  | 54.32                        | 1.32                   |
| 0.50             | 4400.76  | 13.38                        | 0.30                   |
| 0.56             | 4709.93  | 9.04                         | 0.19                   |



### Live Gas Chromatography report for identification of ammonia peak

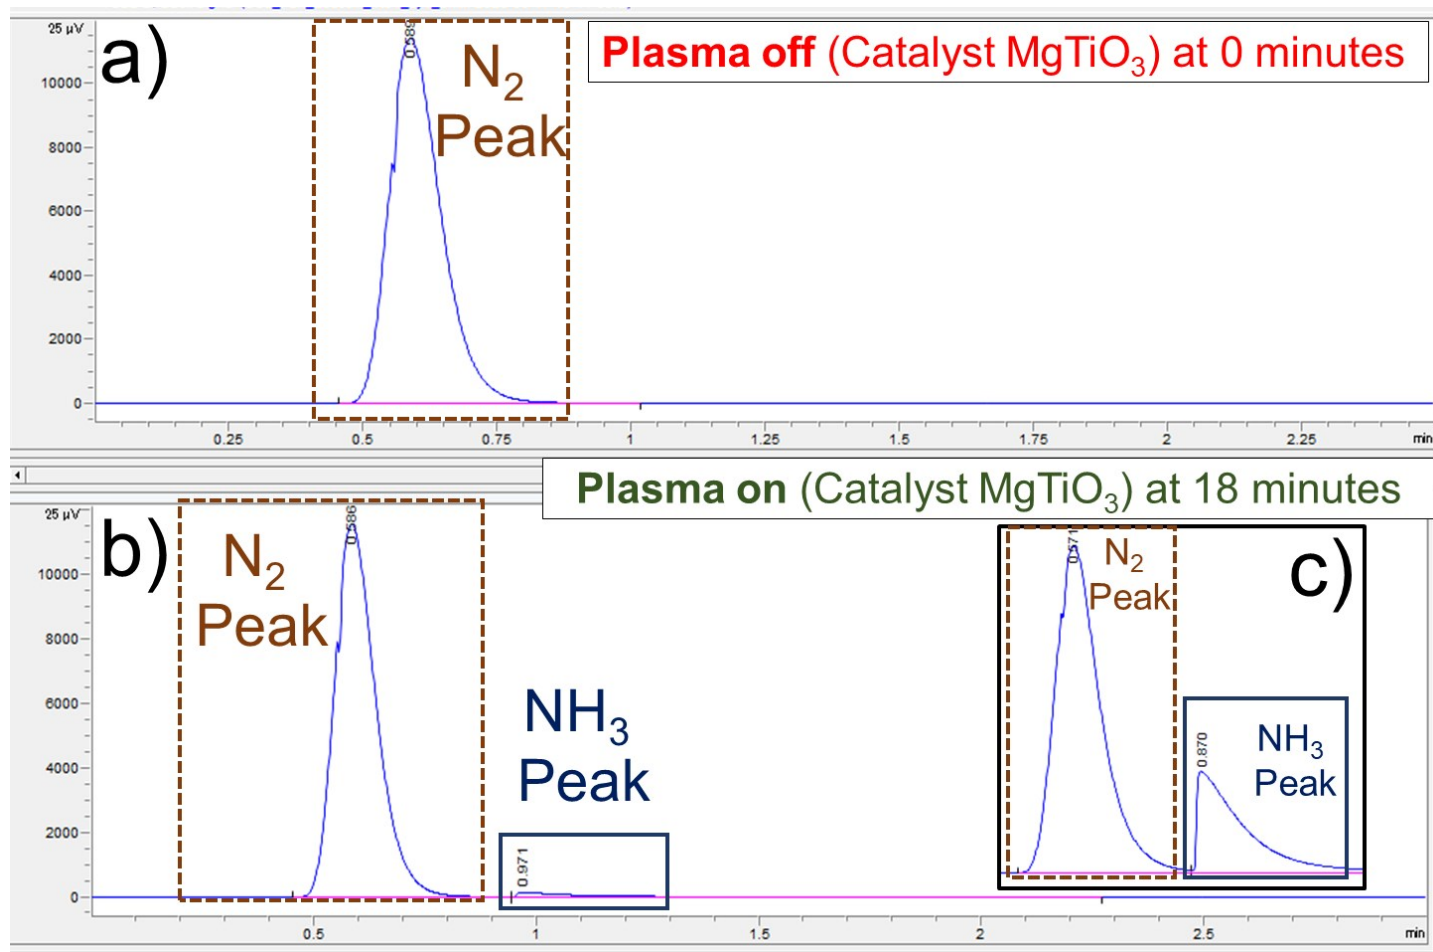

Figure S11 Quantification of Ammonia via Gas chromatography for  $\text{MgTiO}_3$  catalyst a) Live GC report when there is no Plasma discharge at 0 minutes, indicating Nitrogen peak b) During Plasma catalytic reaction (at 18 minutes) indicating two peaks, Nitrogen followed by ammonia, c) *Inset*: Nitrogen + Ammonia calibration gas.

## DBD Reactor Setup

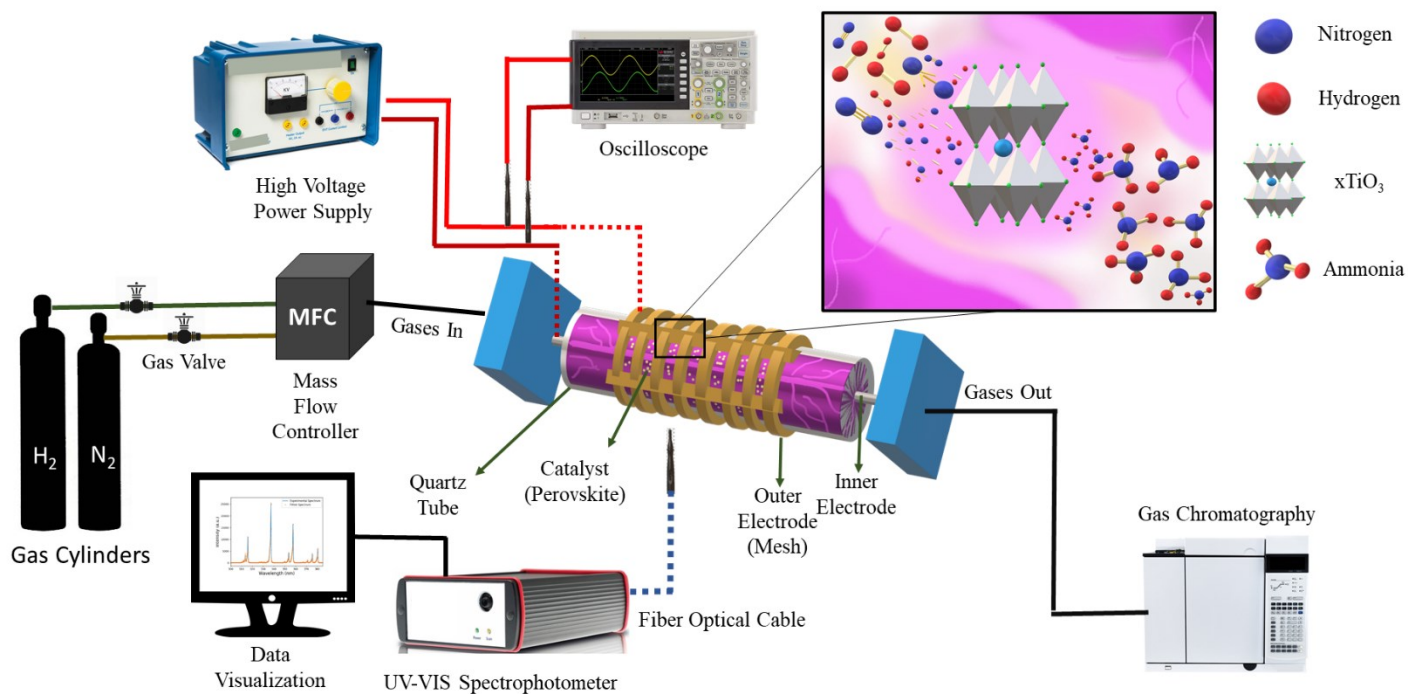

Figure S12 Schematic of Dielectric Barrier Discharge (DBD) reactor.

### Catalyst Characterization (Surface Area)

Table S5 Surface area ( $\text{m}^2 \text{g}^{-1}$ ) of the perovskite samples.

| <b>Perovskite</b>        | <b>Fresh (<math>\text{m}^2 \text{g}^{-1}</math>)</b> | <b>Spent (<math>\text{m}^2 \text{g}^{-1}</math>)</b> |
|--------------------------|------------------------------------------------------|------------------------------------------------------|
| <b>MgTiO<sub>3</sub></b> | 3.35                                                 | 3.15                                                 |
| <b>CaTiO<sub>3</sub></b> | 5.58                                                 | 5.05                                                 |
| <b>SrTiO<sub>3</sub></b> | 2.61                                                 | 2.60                                                 |
| <b>BaTiO<sub>3</sub></b> | 3.18                                                 | 3.13                                                 |

### Perovskites Porosity ( $\phi$ ) (Fresh Vs. Spent)

| Table S6 Textural properties of fresh perovskite catalysts. |                                                                  |                                                                         |                                       |
|-------------------------------------------------------------|------------------------------------------------------------------|-------------------------------------------------------------------------|---------------------------------------|
| Perovskite                                                  | Surface area <sup>[a]</sup><br>(m <sup>2</sup> g <sup>-1</sup> ) | Total Pore Volume <sup>[b]</sup><br>(cm <sup>3</sup> /g <sup>-1</sup> ) | Porosity <sup>[c]</sup><br>( $\phi$ ) |
| MgTiO <sub>3</sub>                                          | 3.35                                                             | 0.002                                                                   | 0.006                                 |
| CaTiO <sub>3</sub>                                          | 5.58                                                             | 0.004                                                                   | 0.014                                 |
| SrTiO <sub>3</sub>                                          | 2.61                                                             | 0.002                                                                   | 0.008                                 |
| BaTiO <sub>3</sub>                                          | 3.18                                                             | 0.001                                                                   | 0.007                                 |

[1] BET method, [2] Measured at P/P<sub>0</sub> = 0.50, [3] *Equation S3*

| Table S7 Textural properties of spent perovskite catalysts. |                                                                  |                                                                         |                                       |
|-------------------------------------------------------------|------------------------------------------------------------------|-------------------------------------------------------------------------|---------------------------------------|
| Perovskite                                                  | Surface area <sup>[a]</sup><br>(m <sup>2</sup> g <sup>-1</sup> ) | Total Pore Volume <sup>[b]</sup><br>(cm <sup>3</sup> /g <sup>-1</sup> ) | Porosity <sup>[c]</sup><br>( $\phi$ ) |
| MgTiO <sub>3</sub>                                          | 3.15                                                             | 0.003                                                                   | 0.009                                 |
| CaTiO <sub>3</sub>                                          | 5.05                                                             | 0.003                                                                   | 0.012                                 |
| SrTiO <sub>3</sub>                                          | 2.60                                                             | 0.002                                                                   | 0.008                                 |
| BaTiO <sub>3</sub>                                          | 3.13                                                             | 0.002                                                                   | 0.012                                 |

[a] BET method, [b] Measured at P/P<sub>0</sub> = 0.50, [c] *Equation S3*

Porosity ( $\phi$ ) was calculated by dividing the total pore volume, measured from the N<sub>2</sub> isotherm at P/P<sub>0</sub> = 0.50, by the specific volume of the perovskite (*Equation S3*). The specific volume was taken as the inverse of the perovskite density: MgTiO<sub>3</sub>, CaTiO<sub>3</sub>, SrTiO<sub>3</sub>, BaTiO<sub>3</sub> were 3.78, 3.98, 4.81, 6.02 cm<sup>3</sup>/g, respectively.

*Equation S3*

$$\phi = \frac{\text{Total Pore Volume [cm}^3\text{/g]}}{\text{Specific Volume [cm}^3\text{/g]}}$$

## References

1. M. L. Carreon, *J. Phys. D*, **2019**, **52**, 483001.
2. K. Sugiyama, A. Kiyoshi, O. Masaaki, M. Hiroshi, M. Tsuneo and N. O. . *Plasma Chem . Plasma Process* . 1986, **6**, 179-193.
3. K.-i. Aika, T. Takano and S. Murata, *J. Catal.*, 1992, **136**, 126-140.
4. B. Mingdong, B. Xiyao, Z. Zhitao and B. Mindi, *Plasma Chem. Plasma Process.*, 2000, **20**, 511-520.
5. H. Bielawa, O. Hinrichsen, A. Birkner and M. Muhler, *Angew . Chem. Int.*, 2001, **40**, 1061-1063.
6. D. Szmigiel, H. Bielawa, M. Kurtz, O. Hinrichsen, M. Muhler, W. Raróg, S. Jodzis, Z. Kowalczyk, L. Znak and J. Zieliński, *J. Catal.*, 2002, **205**, 205-212.
7. P. Peng, Y. Cheng, R. Hatzenbeller, M. Addy, N. Zhou, C. Schiappacasse, D. Chen, Y. Zhang, E. Anderson and Y. Liu, *Int . J. Hydrog. Energy*, 2017, **42**, 19056-19066.
8. H. H. Kim, Y. Teramoto, A. Ogata, H. Takagi and T. Nanba, *Plasma Process Polym*, 2017, **14**, 1600157.
9. P. Peng, Y. Li, Y. Cheng, S. Deng, P. Chen and R. Ruan, *Plasma Chem. Plasma Process.*, 2016, **36**, 1201-1210.
10. B. S. Patil, A. S. R. Van Kaathoven, F. J. J. Peeters, N. Cherkasov, J. Lang, Q. Wang and V. Hessel, *J. Phys. D*, 2020, **53**, 144003.
11. H. Ronduda, M. Zybert, W. Patkowski, A. Tarka, A. Ostrowski and W. Raróg-Pilecka, *J Taiwan Inst Chem Eng*, 2020, **114**, 241-248.
12. J. R. Shah, F. Gorky, J. Lucero, M. A. Carreon and M. L. Carreon, *Ind. Eng. Chem . Res.*, 2020, **59**, 5167-5176.
13. M. Krishtab, I. Stassen, T. Stassin, A. J. Cruz, O. O. Okudur, S. Armini, C. Wilson, S. De Gendt and R. Ameloot, *Nat. Commun.*, 2019, **10**, 1-9.
14. M. Rybicki and J. Sauer, *Catal . Today*, 2019, **323**, 86-93.
15. J. Robertson, *EPJ Appl. Phys.*, 2004, **28**, 265-291.
16. B. D. Lee, H. Y. Ki, S. K. Eung and H. K. Tae, *Jpn J Appl Phys*, 2003, **42**, 6158.
17. V. M. Ferreira and J. L. Baptista, *Mater. Res. Bull.*, 1994, **29**, 1017-1023.
18. V. V. Lemanov, A. V. Sotnikov, E. P. Smirnova, M. Weihnacht and R. Kunze, *Solid State Communications*, 1999, **110**, 611-614.
19. B. H. Hoerman, G. M. Ford, L. D. Kaufmann and B. W. Wessels, *Applied physics letters*, 1998, **73**, 2248-2250.
